# Supplementary material
Source: PubMed Central journal article supplement (PMC5818817)

## Supplementary Online Content

Gage BF, Bass AR, Lin H, et al. Effect of genotype-guided warfarin dosing on clinical events and anticoagulation control among patients undergoing hip or knee arthroplasty: the GIFT randomized clinical trial. *JAMA*. doi:10.1001/jama.2017.11469

**eTable 1.** Demographic and Clinical Characteristics of Randomized Participants

**eTable 2.** Number of Participants with Secondary Endpoints from Randomization until Post-op Day 30

**eFigure.** Kaplan-Meier Plot Showing the Time to a Therapeutic INR in Participants Randomized to Clinically Guided Dosing or Genotype-Guided Dosing

This supplementary material has been provided by the authors to give readers additional information about their work.

**eTable 1. Demographic and Clinical Characteristics of Randomized Participants**

|                                                      | <b>N (%)</b>                     | <b>N (%)</b>                 | <b>p-value</b> |
|------------------------------------------------------|----------------------------------|------------------------------|----------------|
|                                                      | <b>Did not get Intervention*</b> | <b>Received Intervention</b> |                |
| <b>Characteristics</b>                               | <b>(n=53)</b>                    | <b>(n=1597)</b>              |                |
| <b>Age in years, mean (SD)</b>                       | 72.0 (5.1)                       | 72.1 (5.4)                   | 0.94           |
| <b>Body mass index (kg/m<sup>2</sup>), mean (SD)</b> | 30.6 (6.2)                       | 29.2 (5.5)                   | 0.11           |
| <b>Baseline INR, mean (SD)</b>                       | 1.03 (0.06)                      | 1.01 (0.06)                  | 0.017          |
| <b>Indication</b>                                    |                                  |                              | 0.0012         |
| Hip Replacement                                      | 24 (45.3)                        | 406 (25.4)                   |                |
| Knee Replacement                                     | 29 (54.7)                        | 1191 (74.6)                  |                |
| <b>Randomization Arm</b>                             |                                  |                              | 0.30           |
| Genotype-guided                                      | 23 (43.4)                        | 808 (50.6)                   |                |
| Clinically-guided                                    | 30 (56.6)                        | 789 (49.4)                   |                |
| <b>Target INR</b>                                    |                                  |                              | 0.0497         |
| 1.8                                                  | 19 (35.9)                        | 804 (50.3)                   |                |
| 2.5                                                  | 34 (64.1)                        | 793 (49.7)                   |                |
| <b>Female</b>                                        | 31 (58.5)                        | 1018 (63.7)                  | 0.43           |
| <b>Race</b>                                          |                                  |                              | 0.71           |
| African American                                     | 4 (7.6)                          | 102 (6.4)                    |                |
| Caucasian                                            | 48 (90.6)                        | 1454 (91.1)                  |                |
| Asian or Indian Subcontinent                         | 0 (0.0)                          | 29 (1.8)                     |                |
| Other or unknown                                     | 1 (1.9)                          | 12 (0.8)                     |                |
| <b>Hispanic</b>                                      | 0 (0.0)                          | 42 (2.6)                     | 0.64           |
| <b>Smoker</b>                                        | 5 (9.4)                          | 54 (3.4)                     | 0.038          |
| <b>Diabetes</b>                                      | 11 (20.8)                        | 221 (13.8)                   | 0.15           |
| <b>Liver Disease</b>                                 | 0 (0.0)                          | 12 (0.75)                    | > 0.99         |

\*53 patients did not get the intervention: 22 did not have arthroplasty, 15 withdrew, 7 were prescribed thromboprophylaxis other than warfarin, 6 developed an exclusion, and 3 were found to be ineligible.

**eTable 2. Number of Participants with Secondary Endpoints from Randomization until Post-op Day 30**

| <b>Secondary Endpoints</b>    | <b>Genotype-Guided Group N = 808<br/>N (%)</b> | <b>Clinical Group N = 789<br/>N (%)</b> | <b>P-value</b> |
|-------------------------------|------------------------------------------------|-----------------------------------------|----------------|
| <b>Adverse Event (AE)*</b>    | <b>123 (15.2)</b>                              | <b>120 (15.2)</b>                       | <b>0.99</b>    |
| Serious AE                    | 46 (5.7)                                       | 56 (7.1)                                | 0.25           |
| Non-serious AE                | 84 (10.4)                                      | 75 (9.5)                                | 0.55           |
| <b>Non-Major bleed</b>        | <b>83 (10.3)</b>                               | <b>83 (10.5)</b>                        | <b>0.87</b>    |
| Clinically relevant bleed     | 56 (6.9)                                       | 66 (8.4)                                | 0.28           |
| Not significant minor bleed   | 43 (5.3)                                       | 36 (4.6)                                | 0.48           |
| <b>Cardiovascular Event</b>   | <b>10 (1.2)</b>                                | <b>13 (1.6)</b>                         | <b>0.49</b>    |
| Myocardial infarction         | 3 (0.4)                                        | 3 (0.4)                                 | 1.00           |
| Stroke                        | 1 (0.1)                                        | 0 (0.0)                                 | 1.00           |
| Atrial fibrillation           | 6 (0.7)                                        | 10 (1.3)                                | 0.29           |
| <b>Infection†</b>             | <b>50 (6.2)</b>                                | <b>48 (6.1)</b>                         | <b>0.93</b>    |
| Serious AE infection          | 15 (1.9)                                       | 12 (1.5)                                | 0.60           |
| AE infection                  | 47 (5.8)                                       | 42 (5.3)                                | 0.67           |
| <b>Infection by location†</b> | <b>50 (6.2)</b>                                | <b>48 (6.1)</b>                         | <b>0.93</b>    |
| Joint infection (hip or knee) | 5 (0.6)                                        | 1 (0.1)                                 | 0.22           |
| Wound drainage or cellulitis  | 23 (2.9)                                       | 24 (3.0)                                | 0.82           |
| Other Infection               | 25 (3.1)                                       | 36 (3.3)                                | 0.82           |

\* Number of participants with one or more adverse events (AE) other than major bleeds, venous thromboembolism, or elevated international normalized ratio values. Participants who had multiple events are counted only once in the bolded rows. For example, a patient who had both post-op myocardial infarction and atrial fibrillation is counted only once in the bolded row titled, "Cardiovascular Event."

† Stitch abscesses without sequelae are not included as infections.

**eFigure.** Kaplan-Meier Plot Showing the Time to a Therapeutic INR in Participants Randomized to Clinically Guided Dosing or Genotype-Guided Dosing

Participants had at least 1 INR measured. For a target of 2.5, INR values in the range of [2-3] were considered therapeutic; for a target of 1.8, INRs in the range of [1.5-2.1] were therapeutic.

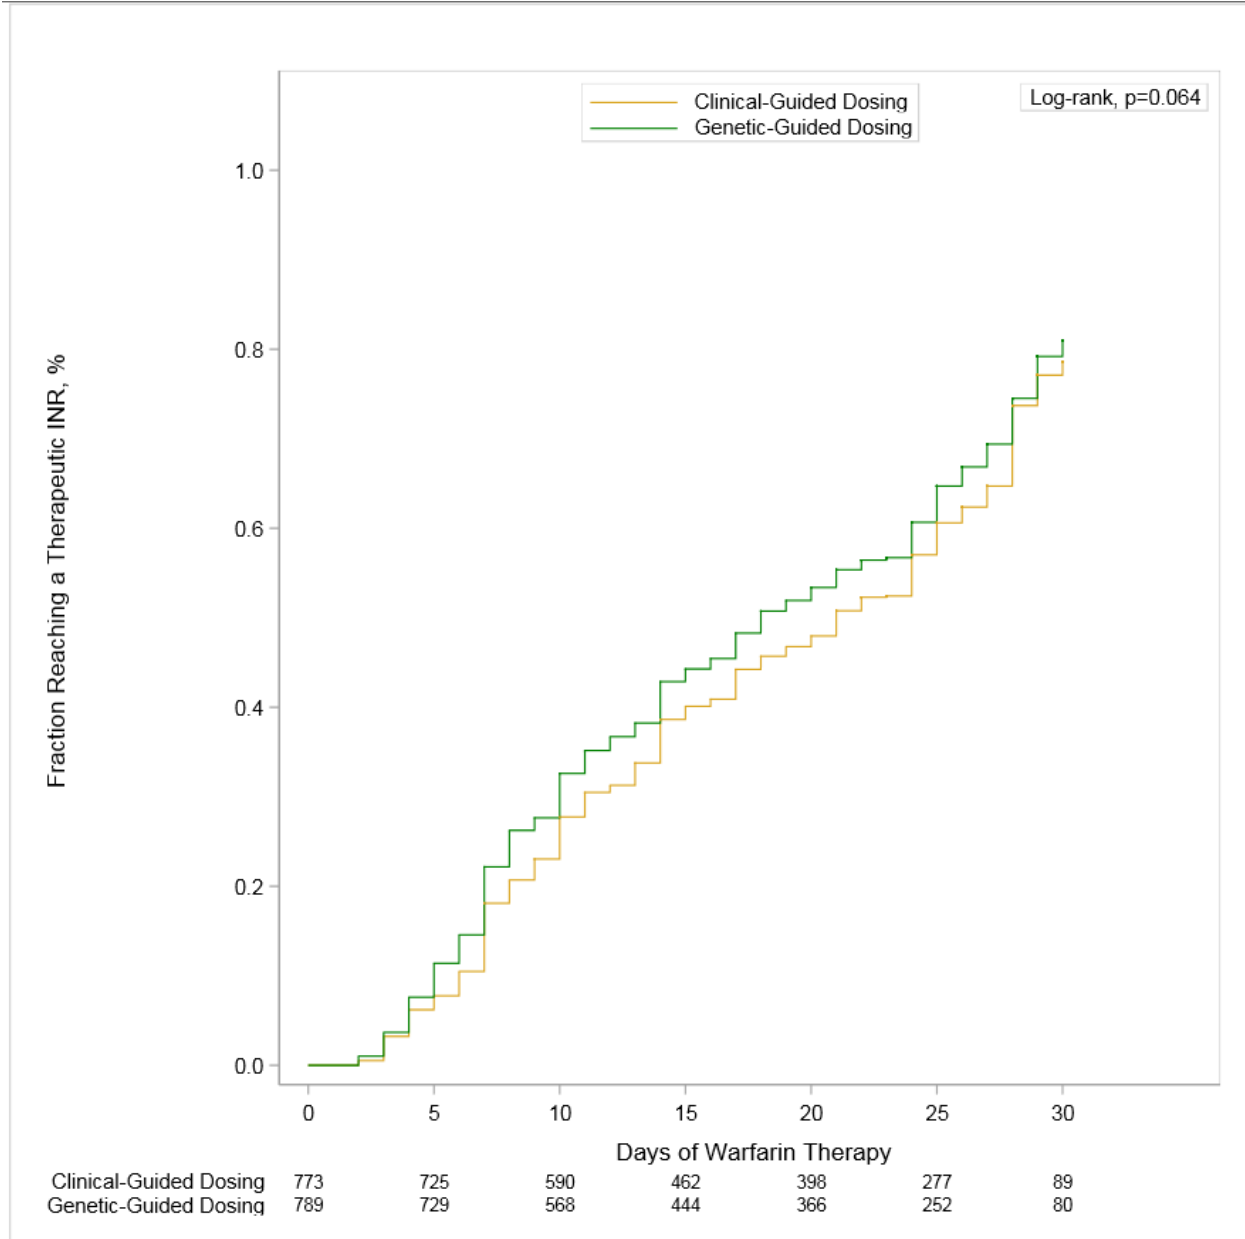

Supplement: jama-e1711469-s002.pdf [file jama-e1711469-s002.pdf]
